# Supplementary material
Source: PubMed Central journal article supplement (PMC3773012)

# Supplemental Figure S1

## A

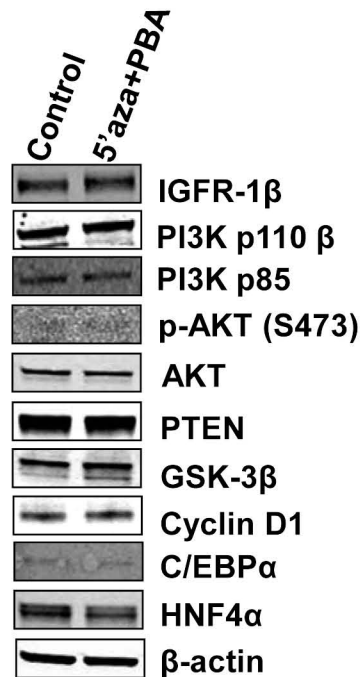

## B

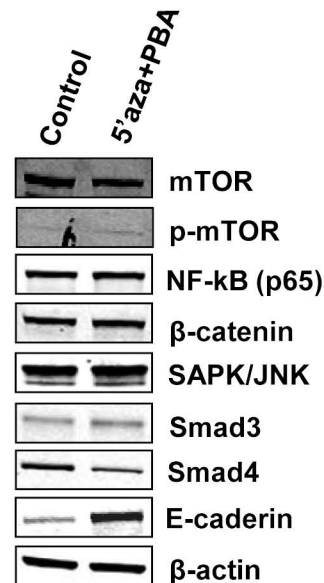

# Supplemental Figure S2

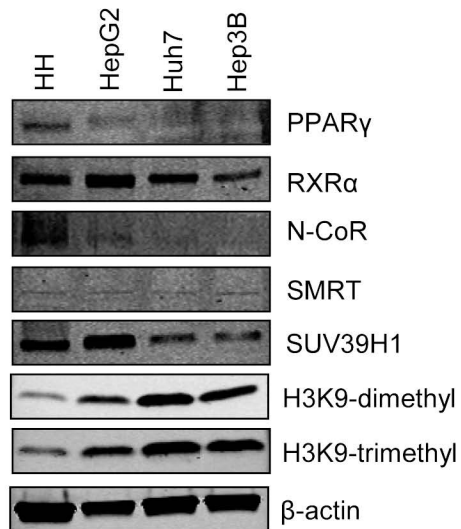

# Supplemental Figure S3

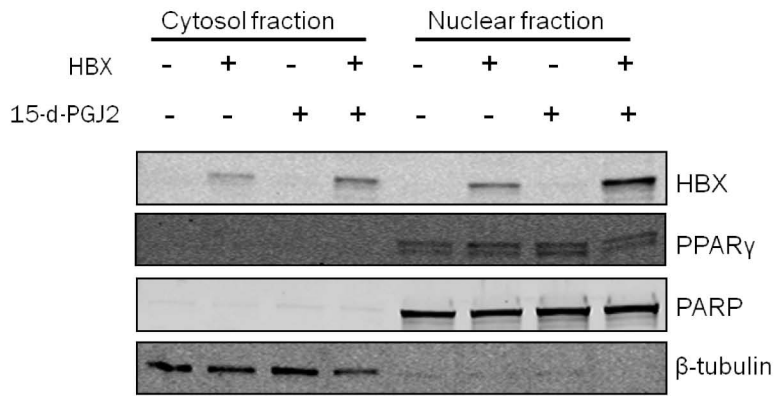

Supplement: NIHMS476571-supplement-Supp_Fig_S1-S3.pdf [file NIHMS476571-supplement-Supp_Fig_S1-S3.pdf]
